# Supplementary material for: Three-body interaction effects in heterolytic hydrogen splitting by frustrated Lewis pairs
Source: Royal Society of Chemistry journal article supplement (doi:10.1039/d3cp00617d), 2023-01-01
Supplement: d3cp00617d1.pdf [file d3cp00617d1.pdf]

## 1. SUPPLEMENTARY INFORMATION

to accompany

### Three-body Interactions Effect Heterolytic Hydrogen Splitting by Frustrated Lewis Pairs

Małgorzata M. Szczeniak<sup>a</sup> and Grzegorz Chałasiński<sup>b</sup>

<sup>a</sup> Department of Chemistry, Oakland University, Rochester, Michigan, 48309 USA

<sup>b</sup> Faculty of Chemistry, University of Warsaw, Pasteura 1, 02-93 Warszawa, Poland

#### Table of Contents

|                                                                   |          |
|-------------------------------------------------------------------|----------|
| <b>Supplementary Tables</b> .....                                 | <b>1</b> |
| <b>Supplementary 2-D structures of reactants considered</b> ..... | <b>2</b> |
| <b>Supplementary Coordinate Files (in Å)</b> .....                | <b>3</b> |

#### Supplementary Tables

Table S1. Interaction energy terms from SAPT pseudo-dimer calculations in the model system P(*t*-Bu)<sub>3</sub>...H<sub>2</sub>...B(C<sub>6</sub>F<sub>5</sub>) for several values of the H-H bond distance; E<sub>ind+ex+δ</sub> denotes the total induction effect in combination with exchange-induction and higher-order terms; ΔE<sub>3-b(CAM)</sub> and ΔE<sub>str</sub>(H<sub>2</sub>) refer to supermolecular CAM-B3LYP-D3 values in kcal/mol.

| H <sub>2</sub> = 0.741                                                                |                 |                   |                       |                 |                      |       |                        |                                     |
|---------------------------------------------------------------------------------------|-----------------|-------------------|-----------------------|-----------------|----------------------|-------|------------------------|-------------------------------------|
| Term                                                                                  | E <sub>es</sub> | E <sub>exch</sub> | E <sub>ind+ex+δ</sub> | δ <sub>HF</sub> | E <sub>disp+ex</sub> | SAPTO | ΔE <sub>3-b(CAM)</sub> | ΔE <sub>str</sub> (H <sub>2</sub> ) |
| A-B + H <sub>2</sub> (TCBS)                                                           | -17.4           | 64.8              | -23.7                 | -11.4           | -16.7                | 6.9   |                        |                                     |
| A+H <sub>2</sub> (DCBS)                                                               | -5.2            | 33.4              | -10.0 <sup>a</sup>    | -4.4            | -10.1                | 8.1   |                        |                                     |
| B+H <sub>2</sub> (DCBS)                                                               | -11.7           | 31.6              | -7.7 <sup>b</sup>     | -4.8            | -5.9                 | 6.3   |                        |                                     |
| 3-body                                                                                | -0.5            | -0.2              | -6.1                  | -2.1            | -0.7                 | -7.5  | -7.8                   | 0.0                                 |
| A + B                                                                                 | -3.4            | 3.7               | -0.6                  | -0.3            | -9.6                 | -10.0 |                        |                                     |
| H <sub>2</sub> = 0.841                                                                |                 |                   |                       |                 |                      |       |                        |                                     |
| A-B + H <sub>2</sub> (TCBS)                                                           | -20.1           | 73.6              | -31.1                 | -14.5           | -19.3                | 3.2   |                        |                                     |
| A+H <sub>2</sub> (DCBS)                                                               | -5.8            | 38.8              | -12.6                 | -5.3            | -11.6                | 8.7   |                        |                                     |
| B+H <sub>2</sub> (DCBS)                                                               | -13.7           | 35.0              | -9.9                  | -5.9            | -6.8                 | 4.6   |                        |                                     |
| 3-body                                                                                | -0.5            | -0.2              | -8.5                  | -3.2            | -0.8                 | -10.1 | -10.2                  | 3.1                                 |
| H <sub>2</sub> =0.941                                                                 |                 |                   |                       |                 |                      |       |                        |                                     |
| A-B + H <sub>2</sub> (TCBS)                                                           | -23.0           | 83.5              | -40.7                 | -18.6           | -22.1                | -2.2  |                        |                                     |
| A+H <sub>2</sub> (DCBS)                                                               | -6.4            | 44.8              | -15.9                 | -6.3            | -13.3                | 9.2   |                        |                                     |
| B+H <sub>2</sub> (DCBS)                                                               | -16.0           | 38.9              | -13.0                 | -7.5            | -7.8                 | 2.1   |                        |                                     |
| 3-body                                                                                | -0.5            | -0.2              | -11.9                 | -4.8            | -1.0                 | -13.5 | -13.3                  | 10.8                                |
| H <sub>2</sub> = 1.041                                                                |                 |                   |                       |                 |                      |       |                        |                                     |
| A-B + H <sub>2</sub> (TCBS)                                                           | -26.2           | 94.6              | -53.1                 | -24.0           | -25.2                | -9.9  |                        |                                     |
| A+H <sub>2</sub> (DCBS)                                                               | -7.1            | 51.5              | -19.9                 | -7.4            | -15.1                | 9.4   |                        |                                     |
| B+H <sub>2</sub> (DCBS)                                                               | -18.5           | 43.2              | -16.9                 | -9.5            | -8.9                 | -1.2  |                        |                                     |
| 3-body                                                                                | -0.6            | 0.0               | -16.3                 | -7.1            | -1.2                 | -18.1 | -17.1                  | 20.9                                |
| H <sub>2</sub> = 1.041 sp <sup>3</sup> B(C <sub>6</sub> F <sub>5</sub> ) <sub>3</sub> |                 |                   |                       |                 |                      |       |                        |                                     |
| A-B + H <sub>2</sub> (TCBS)                                                           | -15.8           | 75.4              | -74.5                 | -42.0           | -20.9                | -35.7 |                        |                                     |
| A+H <sub>2</sub> (DCBS)                                                               | 3.9             | 33.0              | -26.9                 | -11.2           | -10.8                | -0.8  |                        |                                     |

|                                             |       |      |       |       |       |       |       |      |
|---------------------------------------------|-------|------|-------|-------|-------|-------|-------|------|
| B+H <sub>2</sub> (DCBS)                     | -18.5 | 43.2 | -16.9 | -9.5  | -8.9  | -1.2  |       |      |
| 3-body                                      | -1.2  | -0.7 | -30.7 | -21.4 | -1.1  | -33.7 | -31.3 | 20.9 |
| A + B                                       | -3.1  | 2.7  | -0.6  | -0.3  | -6.8  | -7.9  |       |      |
| $H_2 = 1.141 \text{ \AA } sp^3 B(C_6F_5)_3$ |       |      |       |       |       |       |       |      |
| A-B + H <sub>2</sub> (TCBS)                 | -17.4 | 84.8 | -94.0 | -52.8 | -23.8 | -50.4 |       |      |
| A+H <sub>2</sub> (DCBS)                     | 5.1   | 38.1 | -32.9 | -13.4 | -12.3 | -2.0  |       |      |
| B+H <sub>2</sub> (DCBS)                     | -21.3 | 47.9 | -21.8 | -12.0 | -10.1 | -5.4  |       |      |
| 3-body                                      | -1.2  | -1.2 | -39.3 | -27.3 | -1.3  | -43.1 | -38.2 | 32.1 |

Table S2. Two- and 3-body interactions (in kcal/mol) in the transition state of P(Ad)<sub>3</sub>...H<sub>2</sub>... B(C<sub>6</sub>F<sub>5</sub>)<sub>3</sub> from pseudo-dimer calculations in the geometry optimized in CAM-B3LYP-D3.

|                             | E <sub>es</sub> | E <sub>exch</sub> | E <sub>ind</sub> | E <sub>ex-ind</sub> | δ <sub>HF</sub> | E <sub>disp+ex</sub> | SAPTO             | ΔE <sub>3-b(CAM)</sub> |
|-----------------------------|-----------------|-------------------|------------------|---------------------|-----------------|----------------------|-------------------|------------------------|
| A-B + H <sub>2</sub> (TCBS) | -17.6           | 52.3              | -24.5            | 14.1                | -11.2           | -15.3                | -2.1              |                        |
| A+H <sub>2</sub> (DCBS)     | -7.4            | 29.0              | -16.4            | 11.1                | -4.6            | -9.2                 | 2.5               |                        |
| B+H <sub>2</sub> (DCBS)     | -9.6            | 24.1              | -6.2             | 4.0                 | -4.1            | -5.5                 | 2.8               |                        |
| 3-body                      | -0.6            | -0.9              | -1.9             | -1.0                | -2.5            | -0.6                 | -7.4              | -7.4                   |
| A + B(DCBS)                 | -6.7            | 11.7              | -6.9             | 6.4                 | -0.9            | -16.1                | -12.5             |                        |
| 3-body/ total, %            |                 |                   |                  |                     |                 |                      | 50.4 <sup>a</sup> |                        |

<sup>a</sup> This ratio in the supermolecular CAM-B3LYP-D3 calculation amounts to 65.6%

Table S3. Two-body and 3-body interactions (in kcal/mol) in P(Ad)<sub>3</sub> ...H<sub>2</sub>...B(C<sub>6</sub>F<sub>5</sub>)<sub>3</sub> model system from pseudo-dimer calculations; (P---B) = 4.745 Å, (P...H) = 2.153 Å, H-H = 1.041 Å with sp<sup>3</sup> hybridized boron

|                             | E <sub>es</sub> | E <sub>exch</sub> | E <sub>ind+ex+δ</sub> | δ <sub>HF</sub> | E <sub>disp+ex</sub> | SAPTO | ΔE <sub>3-b(CAM)</sub> |  |
|-----------------------------|-----------------|-------------------|-----------------------|-----------------|----------------------|-------|------------------------|--|
| A-B + H <sub>2</sub> (TCBS) | -15.7           | 73.2              | -79.1                 | -47.2           | -21.3                | -42.9 |                        |  |
| A+H <sub>2</sub> (DCBS)     | 3.7             | 32.8              | -26.3                 | -11.0           | -10.9                | -0.7  |                        |  |
| B+H <sub>2</sub> (DCBS)     | -18.0           | 38.9              | -17.3                 | -10.6           | -9.0                 | -5.5  |                        |  |
| 3-body                      | -1.4            | 1.5               | -35.5                 | -25.6           | -1.3                 | -36.8 | -34.6                  |  |
| A + B(DCBS)                 | -4.3            | 3.7               | -1.0                  | -0.5            | -9.4                 | -10.9 |                        |  |
| 3-body/ total, %            |                 |                   |                       |                 |                      |       | 68.2 <sup>a</sup>      |  |

<sup>a</sup> This ratio in the supermolecular CAM-B3LYP-D3 calculation amounts to 69.4%

### Supplementary 2-D structures of reactants considered

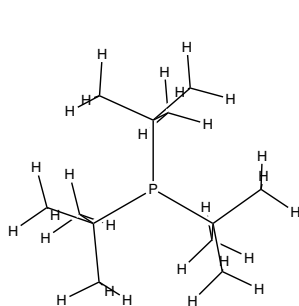

P(*t*-Bu)<sub>3</sub>

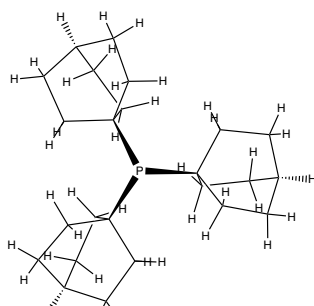

P(Ad)<sub>3</sub>

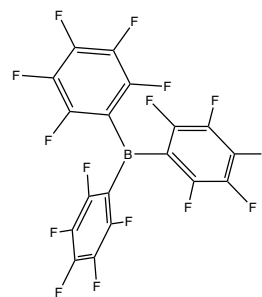

B(C<sub>6</sub>F<sub>5</sub>)<sub>3</sub>

Supplementary Coordinate Files (in Å)

a. P(t-Bu)<sub>3</sub>+B(C<sub>6</sub>F<sub>5</sub>)<sub>3</sub> FLP

74

P-tBut3+B(C6F5)3 CAM-B3LYP-D3(BJ)/DefTZVP optimized C3 group

|   |          |          |          |
|---|----------|----------|----------|
| P | 0.00000  | 0.00000  | 2.58998  |
| C | 1.48687  | 0.97258  | 3.29385  |
| C | 0.09884  | -1.77396 | 3.29385  |
| C | -1.24370 | -2.49339 | 3.11775  |
| H | -1.60824 | -2.43305 | 2.09556  |
| H | -2.01672 | -2.12681 | 3.78632  |
| H | -1.09586 | -3.55104 | 3.34794  |
| C | 1.08333  | -2.54437 | 2.39965  |
| H | 2.09552  | -2.15515 | 2.43207  |
| H | 0.74596  | -2.53331 | 1.36388  |
| H | 1.12169  | -3.58610 | 2.72760  |
| C | 0.51901  | -1.92709 | 4.75679  |
| H | 1.52784  | -1.57154 | 4.94512  |
| H | 0.49797  | -2.98735 | 5.02320  |
| H | -0.15266 | -1.40744 | 5.43563  |
| C | -1.58571 | 0.80138  | 3.29385  |
| C | -1.92841 | 0.51407  | 4.75679  |
| H | -1.14255 | 0.83593  | 5.43563  |
| H | -2.12492 | -0.53738 | 4.94512  |
| H | -2.83611 | 1.06242  | 5.02320  |
| C | -1.53749 | 2.32378  | 3.11775  |
| H | -0.83351 | 2.80993  | 3.78632  |
| H | -2.52735 | 2.72456  | 3.34794  |
| H | -1.30297 | 2.60930  | 2.09556  |
| C | -2.74515 | 0.33400  | 2.39965  |
| H | -2.56689 | 0.62063  | 1.36388  |
| H | -3.66650 | 0.82164  | 2.72760  |
| H | -2.91417 | -0.73720 | 2.43207  |
| C | 2.78119  | 0.16962  | 3.11775  |
| H | 3.62322  | 0.82647  | 3.34794  |
| H | 2.91121  | -0.17625 | 2.09556  |
| H | 2.85023  | -0.68312 | 3.78632  |
| C | 1.40941  | 1.41302  | 4.75679  |
| H | 2.33814  | 1.92493  | 5.02320  |
| H | 1.29521  | 0.57151  | 5.43563  |
| H | 0.59707  | 2.10892  | 4.94512  |
| C | 1.66183  | 2.21037  | 2.39965  |
| H | 2.54481  | 2.76446  | 2.72760  |
| H | 0.81865  | 2.89235  | 2.43207  |
| H | 1.82093  | 1.91268  | 1.36388  |
| B | 0.00000  | 0.00000  | -1.55695 |

|   |          |          |          |
|---|----------|----------|----------|
| C | 0.60879  | 1.43870  | -1.56377 |
| C | 1.79046  | 1.74558  | -2.22971 |
| C | 2.36568  | 2.99815  | -2.20508 |
| C | 1.76034  | 4.00603  | -1.47844 |
| C | 0.58136  | 3.75156  | -0.80551 |
| C | 0.02392  | 2.49321  | -0.87303 |
| F | -1.11710 | 2.31476  | -0.20883 |
| F | 0.00000  | 4.71382  | -0.09934 |
| F | 2.30510  | 5.20895  | -1.43159 |
| F | 3.49090  | 3.24349  | -2.86454 |
| F | 2.41768  | 0.81488  | -2.94984 |
| C | 0.94155  | -1.24658 | -1.56377 |
| C | 0.61649  | -2.42338 | -2.22971 |
| C | 1.41364  | -3.54781 | -2.20508 |
| C | 2.58915  | -3.52751 | -1.47844 |
| C | 2.95826  | -2.37925 | -0.80551 |
| C | 2.14723  | -1.26732 | -0.87303 |
| F | 2.56319  | -0.18994 | -0.20883 |
| F | 4.08229  | -2.35691 | -0.09934 |
| F | 3.35853  | -4.60075 | -1.43159 |
| F | 1.06349  | -4.64495 | -2.86454 |
| F | -0.50313 | -2.50121 | -2.94984 |
| C | -1.55034 | -0.19212 | -1.56377 |
| C | -2.40695 | 0.67780  | -2.22971 |
| C | -3.77932 | 0.54966  | -2.20508 |
| C | -4.34949 | -0.47852 | -1.47844 |
| C | -3.53963 | -1.37231 | -0.80551 |
| C | -2.17114 | -1.22589 | -0.87303 |
| F | -1.44609 | -2.12482 | -0.20883 |
| F | -4.08229 | -2.35691 | -0.09934 |
| F | -5.66363 | -0.60820 | -1.43159 |
| F | -4.55439 | 1.40147  | -2.86454 |
| F | -1.91455 | 1.68633  | -2.94984 |

b. P(Ad)<sub>3</sub>+B(C<sub>6</sub>F<sub>5</sub>)<sub>3</sub> FLP

98

P(Ad)<sub>3</sub> - B(C<sub>6</sub>F<sub>5</sub>)<sub>3</sub> optimized CAM-C3LYP-D3(BJ)/Def2-TZVP C3

|   |         |          |         |
|---|---------|----------|---------|
| P | 0.00000 | 0.00000  | 1.81015 |
| C | 1.13201 | -1.36069 | 2.51102 |
| C | 2.39880 | -1.38495 | 1.62068 |
| H | 2.80980 | -0.39518 | 1.46551 |
| H | 2.09849 | -1.75301 | 0.63885 |
| C | 3.47312 | -2.30230 | 2.23068 |
| H | 4.22702 | -1.71178 | 2.75652 |
| H | 3.99654 | -2.84579 | 1.44186 |
| C | 2.80845 | -3.27169 | 3.20307 |
| C | 2.34632 | -2.49254 | 4.43034 |
| C | 1.56286 | -1.23881 | 3.98457 |

|   |          |          |         |
|---|----------|----------|---------|
| H | 2.18742  | -0.35819 | 4.11150 |
| H | 0.69738  | -1.09750 | 4.62556 |
| H | 1.71944  | -3.13492 | 5.05299 |
| H | 3.20207  | -2.20251 | 5.04219 |
| C | 1.57987  | -3.86298 | 2.52211 |
| C | 0.51209  | -2.76363 | 2.32623 |
| H | 0.08927  | -2.85429 | 1.33076 |
| H | -0.29904 | -2.91353 | 3.03458 |
| H | 1.86418  | -4.29342 | 1.55956 |
| H | 1.16964  | -4.67837 | 3.11963 |
| H | 3.50289  | -4.06156 | 3.49332 |
| C | -1.74440 | -0.30001 | 2.51102 |
| C | -2.64942 | 0.93833  | 2.32623 |
| H | -2.51652 | 1.34983  | 1.33076 |
| H | -2.37367 | 1.71575  | 3.03458 |
| C | -4.13537 | 0.56329  | 2.52211 |
| H | -4.65030 | 0.53228  | 1.55956 |
| H | -4.63640 | 1.32625  | 3.11963 |
| C | -4.23759 | -0.79634 | 3.20307 |
| C | -3.73041 | -1.85666 | 2.23068 |
| C | -2.39880 | -1.38495 | 1.62068 |
| H | -2.56739 | -0.94084 | 0.63885 |
| H | -1.74713 | -2.23577 | 1.46551 |
| H | -3.59596 | -2.80481 | 2.75652 |
| H | -4.46280 | -2.03821 | 1.44186 |
| C | -3.33176 | -0.78570 | 4.43034 |
| C | -1.85427 | -0.73407 | 3.98457 |
| H | -1.29915 | -0.05520 | 4.62556 |
| H | -1.40391 | -1.71527 | 4.11150 |
| H | -3.57464 | 0.07838  | 5.05299 |
| H | -3.50846 | -1.67182 | 5.04219 |
| H | -5.26886 | -1.00281 | 3.49332 |
| C | 0.61238  | 1.66070  | 2.51102 |
| C | 2.13733  | 1.82530  | 2.32623 |
| H | 2.42725  | 1.50445  | 1.33076 |
| H | 2.67271  | 1.19779  | 3.03458 |
| C | 2.55551  | 3.29969  | 2.52211 |
| H | 2.78612  | 3.76114  | 1.55956 |
| H | 3.46677  | 3.35212  | 3.11963 |
| C | 1.42914  | 4.06803  | 3.20307 |
| C | 0.25729  | 4.15896  | 2.23068 |
| C | -0.00000 | 2.76990  | 1.62068 |
| H | 0.46890  | 2.69385  | 0.63885 |
| H | -1.06266 | 2.63095  | 1.46551 |
| H | -0.63106 | 4.51660  | 2.75652 |
| H | 0.46626  | 4.88400  | 1.44186 |
| C | 0.98544  | 3.27824  | 4.43034 |
| C | 0.29141  | 1.97288  | 3.98457 |

|   |          |          |          |
|---|----------|----------|----------|
| H | 0.60177  | 1.15270  | 4.62556  |
| H | -0.78351 | 2.07346  | 4.11150  |
| H | 1.85520  | 3.05654  | 5.05299  |
| H | 0.30639  | 3.87433  | 5.04219  |
| H | 1.76597  | 5.06437  | 3.49332  |
| B | -0.00000 | -0.00000 | -2.28378 |
| C | 1.45254  | -0.57768 | -2.28879 |
| C | 2.49503  | 0.03143  | -1.60068 |
| C | 3.76032  | -0.50798 | -1.51622 |
| C | 4.03483  | -1.69439 | -2.16675 |
| C | 3.04125  | -2.32184 | -2.89442 |
| C | 1.78223  | -1.76240 | -2.93870 |
| F | 0.86704  | -2.41109 | -3.65971 |
| F | 3.30632  | -3.45363 | -3.53531 |
| F | 5.24283  | -2.22617 | -2.09700 |
| F | 4.70794  | 0.09423  | -0.80755 |
| F | 2.29826  | 1.17749  | -0.95110 |
| C | -0.22599 | 1.54678  | -2.28879 |
| C | -1.27473 | 2.14505  | -1.60068 |
| C | -1.44024 | 3.51052  | -1.51622 |
| C | -0.55003 | 4.34146  | -2.16675 |
| C | 0.49014  | 3.79472  | -2.89442 |
| C | 0.63517  | 2.42466  | -2.93870 |
| F | 1.65455  | 1.95643  | -3.65971 |
| F | 1.33777  | 4.59017  | -3.53531 |
| F | -0.69349 | 5.65351  | -2.09700 |
| F | -2.43557 | 4.03008  | -0.80755 |
| F | -2.16886 | 1.40161  | -0.95110 |
| C | -1.22655 | -0.96910 | -2.28879 |
| C | -1.22030 | -2.17648 | -1.60068 |
| C | -2.32008 | -3.00254 | -1.51622 |
| C | -3.48480 | -2.64707 | -2.16675 |
| C | -3.53140 | -1.47289 | -2.89442 |
| C | -2.41740 | -0.66226 | -2.93870 |
| F | -2.52159 | 0.45466  | -3.65971 |
| F | -4.64409 | -1.13654 | -3.53531 |
| F | -4.54934 | -3.42733 | -2.09700 |
| F | -2.27237 | -4.12431 | -0.80755 |
| F | -0.12940 | -2.57909 | -0.95110 |

c. P(tBu)<sub>3</sub>...H<sub>2</sub>...B(C<sub>6</sub>F<sub>5</sub>)<sub>3</sub> transition state geometry

76

P(tBu)<sub>3</sub>--H<sub>2</sub>--B(C<sub>6</sub>F<sub>5</sub>)<sub>3</sub> Transition State CAM-B3LYP-D3(BJ)/Def2-TZVP

|   |             |            |            |
|---|-------------|------------|------------|
| C | 0.00000000  | 0.00000000 | 0.00000000 |
| P | -0.45276700 | 1.66268500 | 0.80695700 |
| C | 0.86524600  | 2.08354400 | 2.11463300 |
| C | 0.77506000  | 3.56218600 | 2.50914900 |

|   |             |             |             |
|---|-------------|-------------|-------------|
| H | -0.23361600 | 3.84788900  | 2.79834000  |
| H | 1.11934100  | 4.23459200  | 1.72902900  |
| H | 1.42011700  | 3.71957300  | 3.37617200  |
| C | 0.49393500  | 1.30690500  | 3.38708900  |
| H | 0.53770900  | 0.22964900  | 3.26841500  |
| H | -0.50961700 | 1.57312200  | 3.71705700  |
| H | 1.19075800  | 1.57822000  | 4.18338400  |
| C | 2.31671100  | 1.78520700  | 1.73587600  |
| H | 2.49962700  | 0.72702400  | 1.57188500  |
| H | 2.96850200  | 2.10146500  | 2.55433100  |
| H | 2.62793800  | 2.32370700  | 0.84355700  |
| C | -0.42646000 | 3.01174200  | -0.53363800 |
| C | 0.94921800  | 3.48579900  | -1.00479300 |
| H | 1.55077700  | 2.67458600  | -1.40775900 |
| H | 1.51928400  | 3.96630400  | -0.21431800 |
| H | 0.81772400  | 4.22395800  | -1.80027800 |
| C | -1.21415600 | 2.53574600  | -1.75966900 |
| H | -0.69642200 | 1.76798000  | -2.32702700 |
| H | -1.35665200 | 3.38901500  | -2.42600700 |
| H | -2.20306700 | 2.16539000  | -1.49076000 |
| C | -1.22095900 | 4.21129700  | 0.00798800  |
| H | -2.24282400 | 3.92205700  | 0.25119400  |
| H | -1.27163100 | 4.97618000  | -0.77018900 |
| H | -0.78186300 | 4.66784200  | 0.88724300  |
| C | 0.31806900  | -1.02948800 | 1.09039100  |
| H | 0.40516700  | -2.01002300 | 0.61811000  |
| H | -0.47754300 | -1.09960800 | 1.82970900  |
| H | 1.25541200  | -0.83647400 | 1.60332100  |
| C | 1.15496800  | 0.01275200  | -1.00211700 |
| H | 1.33025700  | -1.00705700 | -1.35447100 |
| H | 2.08294900  | 0.37137800  | -0.56354900 |
| H | 0.93879500  | 0.62005400  | -1.87720000 |
| C | -1.26461800 | -0.53074000 | -0.69554100 |
| H | -1.06552700 | -1.54309200 | -1.05435400 |
| H | -1.56847400 | 0.06126500  | -1.55123200 |
| H | -2.10191000 | -0.58455300 | -0.00183000 |
| B | -4.63636700 | 1.67576300  | 2.50356800  |
| C | -5.60986100 | 0.76646200  | 1.65309700  |
| C | -6.24798300 | -0.34473900 | 2.18219300  |
| C | -7.10252500 | -1.14243600 | 1.44660600  |
| C | -7.33785900 | -0.84163500 | 0.12017600  |
| C | -6.72333700 | 0.25699600  | -0.45057600 |
| C | -5.89022500 | 1.03703600  | 0.32128800  |
| F | -5.32570100 | 2.09305500  | -0.27476400 |
| F | -6.94546300 | 0.55224500  | -1.72638000 |
| F | -8.14957400 | -1.59875100 | -0.60117800 |
| F | -7.69704700 | -2.19176500 | 2.00238700  |
| F | -6.07078600 | -0.68209900 | 3.46253100  |

|   |             |             |            |
|---|-------------|-------------|------------|
| C | -3.76321000 | 1.00365200  | 3.63225000 |
| C | -3.61357200 | 1.53799800  | 4.90318200 |
| C | -2.83354400 | 0.95109400  | 5.88036500 |
| C | -2.15976100 | -0.22009200 | 5.59823600 |
| C | -2.28547200 | -0.79330500 | 4.34840200 |
| C | -3.08121200 | -0.18306200 | 3.40366300 |
| F | -3.17049900 | -0.78522400 | 2.21374900 |
| F | -1.63094400 | -1.91552700 | 4.06512300 |
| F | -1.39433500 | -0.78800100 | 6.51689400 |
| F | -2.72470000 | 1.50315200  | 7.08323000 |
| F | -4.24856100 | 2.66120200  | 5.24598600 |
| C | -4.85124300 | 3.24026600  | 2.50102900 |
| C | -6.07481300 | 3.84375700  | 2.25047800 |
| C | -6.24575000 | 5.21499200  | 2.22207600 |
| C | -5.16189300 | 6.04029600  | 2.44237100 |
| C | -3.92339500 | 5.48382900  | 2.70192400 |
| C | -3.79870700 | 4.11333900  | 2.73852200 |
| F | -2.58340100 | 3.62660700  | 3.00576200 |
| F | -2.87262000 | 6.26888000  | 2.91502300 |
| F | -5.30655900 | 7.35531800  | 2.40901100 |
| F | -7.44028800 | 5.74298200  | 1.98272500 |
| F | -7.16750600 | 3.10729600  | 2.03841500 |
| H | -3.48370700 | 1.72445200  | 1.18171100 |
| H | -2.69936000 | 1.68004100  | 1.24650900 |

d. P(Ad)<sub>3</sub>...H<sub>2</sub>...B(C<sub>6</sub>F<sub>5</sub>)<sub>3</sub> Transition state geometry

100

| FLP-adamanene-H2 | TS          | CAM-B3LYP-D3 | Def2TZVP    |
|------------------|-------------|--------------|-------------|
| P                | -1.19035900 | 0.26565400   | 1.45293300  |
| C                | 0.00000000  | 0.00000000   | 0.00000000  |
| C                | -0.49056800 | 0.90101300   | -1.15891100 |
| H                | -0.68314000 | 1.91562800   | -0.83522900 |
| H                | -1.44499800 | 0.49996600   | -1.50257500 |
| C                | 0.53558300  | 0.91190500   | -2.30624300 |
| H                | 1.13379400  | 1.82543200   | -2.27460200 |
| H                | 0.02217400  | 0.90784600   | -3.26911600 |
| C                | 1.44665100  | -0.30429100  | -2.17616800 |
| C                | 2.34493400  | -0.11725500  | -0.95743800 |
| C                | 1.48972200  | 0.28821100   | 0.26273400  |
| H                | 1.62673000  | 1.34751300   | 0.46683000  |
| H                | 1.83094900  | -0.24312400  | 1.14727400  |
| H                | 2.88171500  | -1.04696700  | -0.75626300 |
| H                | 3.10091200  | 0.64429200   | -1.15489900 |
| C                | 0.57329700  | -1.53128400  | -1.94454600 |
| C                | -0.10666100 | -1.43531800  | -0.56042800 |
| H                | -1.15063300 | -1.71873600  | -0.65691600 |
| H                | 0.35747400  | -2.14153400  | 0.12400100  |
| H                | -0.17845100 | -1.60148300  | -2.73314300 |



|   |             |             |             |
|---|-------------|-------------|-------------|
| H | 1.17265300  | -2.44087300 | -2.00206900 |
| H | 2.05014600  | -0.42916300 | -3.07630800 |
| C | -1.00639000 | -1.19042800 | 2.65215200  |
| C | -1.69850400 | -0.88397200 | 3.99873500  |
| H | -2.67841500 | -0.44500700 | 3.81793100  |
| H | -1.12014500 | -0.15614700 | 4.56298100  |
| C | -1.86523200 | -2.17395500 | 4.83234700  |
| H | -2.90789800 | -2.49731700 | 4.82945300  |
| H | -1.60058900 | -1.98069800 | 5.87279400  |
| C | -0.98427300 | -3.27616000 | 4.25605700  |
| C | -1.53416600 | -3.65912200 | 2.88587800  |
| C | -1.81358300 | -2.38078500 | 2.07512900  |
| H | -2.87252600 | -2.12256500 | 2.13255300  |
| H | -1.60084700 | -2.55863900 | 1.03011900  |
| H | -0.81318400 | -4.29204400 | 2.36341200  |
| H | -2.44857100 | -4.24570000 | 2.98720000  |
| C | 0.42566700  | -2.72123200 | 4.07908100  |
| C | 0.42762200  | -1.66370300 | 2.95496400  |
| H | 1.05732800  | -0.82440400 | 3.23630900  |
| H | 0.86550600  | -2.08979800 | 2.05504100  |
| H | 0.76415000  | -2.28100000 | 5.01974600  |
| H | 1.12437500  | -3.52434800 | 3.83989200  |
| H | -0.97153300 | -4.14103300 | 4.92076800  |
| C | -0.69020500 | 1.85400300  | 2.35756200  |
| C | -0.50761800 | 3.01546100  | 1.35631800  |
| H | -1.33397400 | 3.02518400  | 0.64997400  |
| H | 0.40506900  | 2.88060200  | 0.78108600  |
| C | -0.46095400 | 4.37113500  | 2.09449700  |
| H | -1.39246500 | 4.91889100  | 1.94041800  |
| H | 0.33813400  | 4.99030200  | 1.68465400  |
| C | -0.24096200 | 4.13704100  | 3.58419800  |
| C | -1.48581100 | 3.46094400  | 4.14976300  |
| C | -1.89270300 | 2.29308500  | 3.23172400  |
| H | -2.69788000 | 2.59788600  | 2.56332300  |
| H | -2.28515500 | 1.48194000  | 3.83062000  |
| H | -1.28031200 | 3.10033700  | 5.16051000  |
| H | -2.30663800 | 4.17483500  | 4.23243700  |
| C | 0.94685400  | 3.19468900  | 3.75257300  |
| C | 0.56684900  | 1.78776300  | 3.24472200  |
| H | 1.40089100  | 1.35228400  | 2.70165500  |
| H | 0.37593400  | 1.13395400  | 4.09338100  |
| H | 1.80199700  | 3.58444500  | 3.19574300  |
| H | 1.25060600  | 3.14621600  | 4.79943600  |
| H | -0.05144500 | 5.08205100  | 4.09525100  |
| B | -5.52975200 | 0.31088100  | 0.17026400  |
| C | -4.73349100 | 1.05038800  | -0.97169400 |
| C | -4.05649100 | 2.23697000  | -0.72541000 |
| C | -3.32163100 | 2.90162100  | -1.68273800 |

|   |             |             |             |
|---|-------------|-------------|-------------|
| C | -3.25112200 | 2.38457100  | -2.96062400 |
| C | -3.92211000 | 1.21610100  | -3.25981000 |
| C | -4.64402200 | 0.57594600  | -2.27183700 |
| F | -5.28212100 | -0.54030300 | -2.63099300 |
| F | -3.86294200 | 0.71613600  | -4.48913800 |
| F | -2.53540600 | 2.99968400  | -3.88930200 |
| F | -2.66685200 | 4.01971200  | -1.38327600 |
| F | -4.08723200 | 2.78392900  | 0.49326700  |
| C | -6.44817700 | 1.16745800  | 1.12880800  |
| C | -6.62513700 | 0.84174400  | 2.46612000  |
| C | -7.40388300 | 1.58207100  | 3.32855800  |
| C | -8.06904000 | 2.69499700  | 2.84974700  |
| C | -7.93774800 | 3.04954200  | 1.52223300  |
| C | -7.13439600 | 2.29087000  | 0.69373800  |
| F | -7.05672300 | 2.67986600  | -0.58186100 |
| F | -8.58167200 | 4.11272400  | 1.05462600  |
| F | -8.83022200 | 3.41416800  | 3.65963300  |
| F | -7.52664100 | 1.23494000  | 4.60475700  |
| F | -6.00975800 | -0.23028100 | 2.97643600  |
| C | -5.71059000 | -1.25643000 | 0.12988600  |
| C | -4.66434700 | -2.09445000 | -0.23245400 |
| C | -4.74781100 | -3.46848600 | -0.21274500 |
| C | -5.93862600 | -4.06576500 | 0.15567000  |
| C | -7.01798800 | -3.27668800 | 0.49751700  |
| C | -6.88763800 | -1.90091800 | 0.48307800  |
| F | -7.97388800 | -1.20193800 | 0.81814700  |
| F | -8.16869300 | -3.84381400 | 0.84044100  |
| F | -6.04307200 | -5.38482500 | 0.17575300  |
| F | -3.70210100 | -4.21855500 | -0.54455800 |
| F | -3.49645500 | -1.57008800 | -0.60945100 |
| H | -3.49532900 | 0.26731700  | 1.28772900  |
| H | -4.26337400 | 0.22625100  | 1.44253600  |

e. P(t-Bu)<sub>3</sub>H<sup>+</sup> -- HB(C<sub>6</sub>F<sub>5</sub>)<sub>3</sub><sup>-</sup> ion-pair geometry

76

Ion-pair P(tBu)H<sup>+</sup> HB(C<sub>6</sub>F<sub>5</sub>)<sub>3</sub><sup>-</sup> optimized CAM-B3LYP-D3(BJ)/Def2-TZVP

|   |          |          |         |
|---|----------|----------|---------|
| P | 0.00000  | 0.00000  | 3.26305 |
| C | 1.53116  | 0.96164  | 3.72907 |
| C | 0.06722  | -1.80684 | 3.72907 |
| C | -1.29066 | -2.49758 | 3.55181 |
| H | -1.66332 | -2.42255 | 2.53486 |
| H | -2.04981 | -2.13932 | 4.24037 |
| H | -1.13785 | -3.55632 | 3.76461 |
| C | 1.02917  | -2.49515 | 2.74683 |
| H | 2.05196  | -2.14480 | 2.81581 |
| H | 0.69245  | -2.37680 | 1.71772 |
| H | 1.02969  | -3.56164 | 2.97504 |

|   |          |          |          |
|---|----------|----------|----------|
| C | 0.52467  | -2.00291 | 5.17675  |
| H | 1.52563  | -1.62528 | 5.36317  |
| H | 0.53758  | -3.07308 | 5.38656  |
| H | -0.15522 | -1.53904 | 5.88975  |
| C | -1.59838 | 0.84521  | 3.72907  |
| C | -1.99691 | 0.54708  | 5.17675  |
| H | -1.25524 | 0.90395  | 5.88975  |
| H | -2.17035 | -0.50860 | 5.36317  |
| H | -2.93015 | 1.07099  | 5.38656  |
| C | -1.51764 | 2.36653  | 3.55181  |
| H | -0.82779 | 2.84485  | 4.24037  |
| H | -2.51094 | 2.76357  | 3.76461  |
| H | -1.26633 | 2.65175  | 2.53486  |
| C | -2.67545 | 0.35629  | 2.74683  |
| H | -2.40459 | 0.58872  | 1.71772  |
| H | -3.59932 | 0.88908  | 2.97504  |
| H | -2.88343 | -0.70465 | 2.81581  |
| C | 2.80830  | 0.13105  | 3.55181  |
| H | 3.64879  | 0.79275  | 3.76461  |
| H | 2.92965  | -0.22920 | 2.53486  |
| H | 2.87761  | -0.70553 | 4.24037  |
| C | 1.47224  | 1.45584  | 5.17675  |
| H | 2.39258  | 2.00209  | 5.38656  |
| H | 1.41046  | 0.63509  | 5.88975  |
| H | 0.64471  | 2.13388  | 5.36317  |
| C | 1.64628  | 2.13886  | 2.74683  |
| H | 2.56962  | 2.67256  | 2.97504  |
| H | 0.83147  | 2.84945  | 2.81581  |
| H | 1.71214  | 1.78808  | 1.71772  |
| B | 0.00000  | 0.00000  | -1.00751 |
| C | 0.45293  | 1.50302  | -1.42155 |
| C | 1.27520  | 1.84017  | -2.48173 |
| C | 1.68041  | 3.13529  | -2.74896 |
| C | 1.25331  | 4.16654  | -1.93650 |
| C | 0.42159  | 3.88171  | -0.87324 |
| C | 0.04276  | 2.57401  | -0.65214 |
| F | -0.78293 | 2.36690  | 0.40023  |
| F | -0.00000 | 4.86275  | -0.06986 |
| F | 1.63697  | 5.41803  | -2.17498 |
| F | 2.47669  | 3.40095  | -3.78246 |
| F | 1.71494  | 0.89708  | -3.32317 |
| C | 1.07519  | -1.14376 | -1.42155 |
| C | 0.95603  | -2.02445 | -2.48173 |
| C | 1.87503  | -3.02292 | -2.74896 |
| C | 2.98168  | -3.16866 | -1.93650 |
| C | 3.15086  | -2.30596 | -0.87324 |
| C | 2.20778  | -1.32404 | -0.65214 |
| F | 2.44126  | -0.50541 | 0.40023  |

|   |          |          |          |
|---|----------|----------|----------|
| F | 4.21126  | -2.43137 | -0.06986 |
| F | 3.87367  | -4.12667 | -2.17498 |
| F | 1.70697  | -3.84535 | -3.78246 |
| F | -0.08057 | -1.93372 | -3.32317 |
| C | -1.52812 | -0.35926 | -1.42155 |
| C | -2.23124 | 0.18427  | -2.48173 |
| C | -3.55544 | -0.11237 | -2.74896 |
| C | -4.23498 | -0.99788 | -1.93650 |
| C | -3.57245 | -1.57575 | -0.87324 |
| C | -2.25054 | -1.24997 | -0.65214 |
| F | -1.65833 | -1.86149 | 0.40023  |
| F | -4.21126 | -2.43137 | -0.06986 |
| F | -5.51063 | -1.29136 | -2.17498 |
| F | -4.18365 | 0.44440  | -3.78246 |
| F | -1.63436 | 1.03664  | -3.32317 |
| H | 0.00000  | 0.00000  | 0.19884  |
| H | 0.00000  | 0.00000  | 1.86015  |

f.  $P(Ad)_3H^+ \cdots HB(C_6F_5)_3^-$  ion-pair geometry

100

Ion-pair  $P(Ad)_3H^+ \cdots HB(C_6F_5)_3^-$  Optimized CAM-B3LYP-D3(BJ)/Def3-TZVP

|   |             |             |             |
|---|-------------|-------------|-------------|
| C | 0.00000000  | 0.00000000  | 0.00000000  |
| C | 0.45666600  | 1.11864900  | -0.97056700 |
| H | -0.29755200 | 1.87802900  | -1.12263400 |
| H | 0.63284200  | 0.66311500  | -1.94547700 |
| C | 1.74371100  | 1.76714200  | -0.42968300 |
| H | 1.51560500  | 2.71990200  | 0.05243700  |
| H | 2.41774200  | 1.98766500  | -1.25714700 |
| C | 2.40695600  | 0.82648200  | 0.57182100  |
| C | 1.55451500  | 0.76580300  | 1.83579800  |
| C | 0.08380700  | 0.49184300  | 1.45878200  |
| H | -0.50082400 | 1.40065300  | 1.57547900  |
| H | -0.34548800 | -0.24463200 | 2.13625900  |
| H | 1.93185300  | -0.01907100 | 2.49370600  |
| H | 1.62548600  | 1.70216600  | 2.38968400  |
| C | 2.46042700  | -0.56798400 | -0.03947700 |
| C | 1.03063800  | -1.13601800 | -0.18699100 |
| H | 0.92987100  | -1.57610600 | -1.17261400 |
| H | 0.86753400  | -1.92312000 | 0.54524400  |
| H | 2.94738400  | -0.52645700 | -1.01439800 |
| H | 3.05782200  | -1.23434700 | 0.58304000  |
| H | 3.41149700  | 1.17413100  | 0.81324600  |
| P | -1.72951700 | -0.49119000 | -0.46722800 |
| C | -2.16889200 | -2.23459000 | 0.00000000  |
| C | -3.66803200 | -2.55914000 | -0.18699100 |
| H | -3.99877600 | -2.25183000 | -1.17261400 |
| H | -4.26813100 | -2.02433700 | 0.54524400  |

|   |             |             |             |
|---|-------------|-------------|-------------|
| C | -3.89099500 | -4.08139100 | -0.03947700 |
| H | -4.09851000 | -4.52387200 | -1.01439800 |
| H | -4.76677900 | -4.26556900 | 0.58304000  |
| C | -2.65661600 | -4.73231700 | 0.57182100  |
| C | -1.51035800 | -4.62826000 | -0.42968300 |
| C | -1.42844700 | -3.18939900 | -0.97056700 |
| H | -1.91103900 | -3.11420500 | -1.94547700 |
| H | -0.39369600 | -2.91591700 | -1.12263400 |
| H | -0.57119100 | -4.90709400 | 0.05243700  |
| H | -1.65639500 | -5.32224900 | -1.25714700 |
| C | -2.28294500 | -3.96374100 | 1.83579800  |
| C | -1.78484800 | -2.55309100 | 1.45878200  |
| H | -2.20800600 | -1.81307400 | 2.13625900  |
| H | -0.70548000 | -2.50119100 | 1.57547900  |
| H | -3.15133400 | -3.89808900 | 2.49370600  |
| H | -1.50751600 | -4.49338600 | 2.38968400  |
| H | -2.85781400 | -5.77609900 | 0.81324600  |
| C | -3.01965800 | 0.76102000  | 0.00000000  |
| C | -2.55115700 | 2.22158800  | -0.18699100 |
| H | -2.11964600 | 2.35436600  | -1.17261400 |
| H | -1.78795400 | 2.47388700  | 0.54524400  |
| C | -3.75798400 | 3.17580500  | -0.03947700 |
| H | -4.03742500 | 3.57675900  | -1.01439800 |
| H | -3.47959400 | 4.02634600  | 0.58304000  |
| C | -4.93889100 | 2.43226500  | 0.57182100  |
| C | -5.42190400 | 1.38754700  | -0.42968300 |
| C | -4.21677000 | 0.59718100  | -0.97056700 |
| H | -3.91035400 | 0.97752000  | -1.94547700 |
| H | -4.49730300 | -0.43568200 | -1.12263400 |
| H | -6.13296600 | 0.71362200  | 0.05243700  |
| H | -5.94989800 | 1.86101400  | -1.25714700 |
| C | -4.46012100 | 1.72436800  | 1.83579800  |
| C | -3.48751000 | 0.58767800  | 1.45878200  |
| H | -2.63505800 | 0.58413500  | 2.13625900  |
| H | -3.98224800 | -0.37303200 | 1.57547900  |
| H | -3.96906900 | 2.44358900  | 2.49370600  |
| H | -5.30652100 | 1.31765000  | 2.38968400  |
| H | -5.74223400 | 3.12839900  | 0.81324600  |
| H | -1.72951700 | -0.49119000 | -1.87022400 |
| B | -1.72951700 | -0.49119000 | -4.70434100 |
| C | -0.77185900 | 0.75605400  | -5.10357600 |
| C | -0.82360300 | 1.91423000  | -4.35202000 |
| C | 0.00559900  | 2.99983100  | -4.53883500 |
| C | 0.94524800  | 2.95866000  | -5.54875300 |
| C | 1.02607700  | 1.83338500  | -6.34378800 |
| C | 0.17479600  | 0.76769200  | -6.11135900 |
| F | 0.30488100  | -0.28270400 | -6.93134800 |
| F | 1.92423700  | 1.78677100  | -7.32611800 |

|   |             |             |             |
|---|-------------|-------------|-------------|
| F | 1.76071800  | 3.99072800  | -5.75238900 |
| F | -0.08603600 | 4.07643000  | -3.75215000 |
| F | -1.72951700 | 2.02464500  | -3.35364600 |
| C | -3.28849200 | -0.28545600 | -5.10357600 |
| C | -4.26562900 | -0.90935500 | -4.35202000 |
| C | -5.62038800 | -0.73404600 | -4.53883500 |
| C | -6.05455700 | 0.10029900  | -5.54875300 |
| C | -5.12045500 | 0.73293700  | -6.34378800 |
| C | -3.77189800 | 0.52855200  | -6.11135900 |
| F | -2.92727000 | 1.16640700  | -6.93134800 |
| F | -5.52916600 | 1.53407400  | -7.32611800 |
| F | -7.35608900 | 0.29048400  | -5.75238900 |
| F | -6.50693300 | -1.35170400 | -3.75215000 |
| F | -3.90829400 | -1.74910700 | -3.35364600 |
| C | -1.12820100 | -1.94416900 | -5.10357600 |
| C | -0.09931900 | -2.47844500 | -4.35202000 |
| C | 0.42623800  | -3.73935500 | -4.53883500 |
| C | -0.07924200 | -4.53253000 | -5.54875300 |
| C | -1.09417300 | -4.03989200 | -6.34378800 |
| C | -1.59144900 | -2.76981500 | -6.11135900 |
| F | -2.56616200 | -2.35727300 | -6.93134800 |
| F | -1.58362200 | -4.79441400 | -7.32611800 |
| F | 0.40682000  | -5.75478100 | -5.75238900 |
| F | 1.40441800  | -4.19829600 | -3.75215000 |
| F | 0.44926000  | -1.74910700 | -3.35364600 |
| H | -1.72951700 | -0.49119000 | -3.49926000 |
